# Supplementary material
Source: HighWire-hosted journal article supplement (https://cmaj.ca/highwire/filestream/148988/field_highwire_adjunct_files/0/221587-com-1-at.pdf)
Supplement: 221587-com-1-at.pdf [file 221587-com-1-at.pdf]

## *Appendix: Key guiding principles for health research and data governance*

### **OCAP® principles to guide First Nations research data (1)**

**Ownership:** specifies the collective relationship of First Nations to knowledge, information and data

**Control:** First Nations, their communities and representatives have the right to control all aspects of research and data management, from collection, use, disclosure and destruction of data

**Access:** First Nations must be able to access information and data about themselves and communities

**Possession:** clear physical control of data, and the mechanism by which ownership is asserted and protected

### **OCAS principles to guide Métis research data (2)**

**Ownership:** legal possession of data, e.g. the Métis Population Data-Base in Manitoba

**Control:** the “power to make decisions about something and decide what should happen”

**Access:** the “right or opportunity to use something that will bring benefit”

**Stewardship:** “responsible planning and management of resource” so research that is completed is in the best interests of Métis health, and will improve health and health services delivery

### **Inuit Qaujimajatuqangit (IQ) principles related to knowledge to support wellness (3)**

1. **Pijitsirniq:** the concept of serving

2. **Aajiiqatigiingniq:** the concept of consensus decision-making

3. **Pilimmaksarniq:** the concept of skills and knowledge acquisition

4. **Piliriqatigiingniq:** the concept of collaborative relationships or working together for a common purpose

5. **Avatimik Kamattiarniq:** the concept of environmental stewardship

6. **Qanuqtuurunnarniq:** the concept of being resourceful to solve problems

### **CARE Principles for Indigenous Data Governance (4)**

**Collective benefit:** Indigenous data used for inclusive development and innovation, improved governance and citizen engagement, and to realize equitable outcomes

**Authority to control:** Indigenous peoples determine data governance protocols, and are actively involved in stewardship decisions

**Responsibility:** a duty to nurture respectful relationships with Indigenous peoples from whom the data originates, including capacity development and embedding data within Indigenous languages and cultures

**Ethics:** a focus on Indigenous peoples rights and wellbeing, including minimizing harm, maximizing benefits, promoting justice and allowing for future use

### **Black Health Equity Working Group principles of data governance (5)**

**Engagement:** genuine, cyclical, accessible consultation with communities

**Governance:** community decision-making about engagement and data collection, management, analysis and use

**Access:** communities are able to access their collective data and determine who can access it

**Protection:** safeguarding of individual rights around identifiable, de-identified, and anonymized data

## **References**

1. The First Nations Information Governance Centre. The First Nations principles of OCAP. 2019.
2. University of Manitoba Faculty of Health Sciences. Framework for research engagement with First Nation, Metis and Inuit peoples. 2019.
3. Tagalik S. Inuit Qaujimajatuqangit: The role of Indigenous knowledge in supporting wellness in Inuit communities in Nunavut. 2009.
4. Carroll SR, Garba I, Figueroa-Rodríguez OL, Holbrook J, Lovett R, Materechera S, et al. The CARE Principles for Indigenous Data Governance. *Data Sci J* [Internet]. 2020 Nov 4;19. Available from: <http://datascience.codata.org/articles/10.5334/dsj-2020-043/>
5. Group BHEW. Engagement, Governance, Access, and Protection (EGAP): A data governance framework for health data collected from Black communities. Toronto, ON; 2021.
